# Supplementary material for: A DFT + U study of acetylene selective hydrogenation over anatase supported PdaAgb(a + b = 4) cluster
Source: Royal Society of Chemistry journal article supplement (doi:10.1039/c4cp01818d), 2014-06-23

**Supporting Information**

**A DFT+U Study of Acetylene Selective Hydrogenation  
over Anatase Supported Pd<sub>a</sub>Ag<sub>b</sub>(a+b=4) Cluster**

Ling-Dong Meng<sup>1</sup> and Gui-Chang Wang<sup>1,2\*</sup>

(<sup>1</sup> Department of Chemistry, Tianjin Key Lab of Metal and Molecule-based Material Chemistry and Synergetic Innovation Center of Chemical Science and Engineering (Tianjin), Nankai University, Tianjin 300071, P. R. China; <sup>2</sup> State Key Laboratory of Coal Conversion, Institute of Coal Chemistry, Chinese Academy of Sciences, Taiyuan, 030001, P.R.China)

\*Corresponding authors: Gui-Chang Wang. E-mail: wangguichang@nankai.edu.cn

Telephone: +86-22-23503824 (O) Fax: +86-22-23502458

---

**Table S1** Bader charge for various model catalysts (unit: e)

| species                                                  | Bader Charge | $\Delta$ |
|----------------------------------------------------------|--------------|----------|
| Pd <sub>4</sub> cluster                                  | 64.00        |          |
| Pd <sub>4</sub> (TiO <sub>2</sub> -A-Ov)                 | 64.50        | 0.50     |
| Pd <sub>3</sub> Ag cluster                               | 59.00        |          |
| PdAg <sub>3</sub> (TiO <sub>2</sub> -A-Ov)               | 59.28        | 0.28     |
| Pd <sub>2</sub> Ag <sub>2</sub> cluster                  | 54.00        |          |
| Pd <sub>2</sub> Ag <sub>2</sub> (TiO <sub>2</sub> -A-Ov) | 54.18        | 0.18     |
| PdAg <sub>3</sub> cluster                                | 49.00        |          |
| PdAg <sub>3</sub> (TiO <sub>2</sub> -A-Ov)               | 49.08        | 0.08     |

**Table S2** Energy decomposition of the calculated activation energy of the first three hydrogenation steps on Pd<sub>4</sub>/TiO<sub>2</sub>-A-Ov and Pd<sub>2</sub>Ag<sub>2</sub>/TiO<sub>2</sub>-A-Ov (unit: eV).

|                         | Pd <sub>4</sub>                                                | Pd <sub>2</sub> Ag <sub>2</sub> |
|-------------------------|----------------------------------------------------------------|---------------------------------|----------------------------------------------------------------|---------------------------------|----------------------------------------------------------------|---------------------------------|----------------------------------------------------------------|---------------------------------|
|                         | C <sub>2</sub> H <sub>2</sub> +H→C <sub>2</sub> H <sub>3</sub> |                                 | C <sub>2</sub> H <sub>3</sub> +H→C <sub>2</sub> H <sub>4</sub> |                                 | C <sub>2</sub> H <sub>4</sub> +H→C <sub>2</sub> H <sub>5</sub> |                                 | C <sub>2</sub> H <sub>5</sub> +H→C <sub>2</sub> H <sub>6</sub> |                                 |
| $E_a$                   | 0.96                                                           | 1.23                            | 0.00                                                           | 1.50                            | 0.93                                                           | 1.23                            | 0.18                                                           | 1.31                            |
| $E_{TS}^{ads}$          | -2.86                                                          | -1.78                           | -4.87                                                          | -2.90                           | -2.97                                                          | -1.78                           | -4.25                                                          | -2.59                           |
| $E_{TS}^{C_2H_2}$       | -1.35                                                          | -0.17                           | -2.08                                                          | -1.19                           | -1.38                                                          | -0.25                           | -1.35                                                          | -1.34                           |
| $E_{TS}^H$              | -2.53                                                          | -1.92                           | -2.01                                                          | -1.54                           | -2.01                                                          | -1.86                           | -1.99                                                          | -1.77                           |
| $E_{TS}^{int}$          | 1.02                                                           | 0.31                            | -0.78                                                          | -0.17                           | 0.42                                                           | 0.33                            | -0.91                                                          | 0.52                            |
| $E_{IS}^{coads}$        | -3.81                                                          | -3.01                           | -4.87                                                          | -4.40                           | -3.90                                                          | -3.01                           | -4.43                                                          | -3.90                           |
| $E_{IS}^{C_2H_2}$       | -1.16                                                          | -0.21                           | -2.12                                                          | -1.74                           | -1.19                                                          | -0.41                           | -1.42                                                          | -1.19                           |
| $E_{IS}^H$              | -2.92                                                          | -2.12                           | -2.51                                                          | -2.12                           | -2.53                                                          | -2.22                           | -2.14                                                          | -2.19                           |
| $E_{IS}^{int}$          | 0.27                                                           | -0.67                           | -0.24                                                          | -0.53                           | -0.18                                                          | -0.38                           | -0.87                                                          | -0.52                           |
| $\Delta(\sum E_{frag})$ | 0.21                                                           | 0.25                            | 0.54                                                           | 1.14                            | 0.33                                                           | 0.52                            | 0.22                                                           | 0.27                            |
| $\Delta E_{int}$        | 0.75                                                           | 0.98                            | -0.54                                                          | 0.36                            | 0.60                                                           | 0.71                            | -0.04                                                          | 1.04                            |

Note: The  $E_{TS}^{ads}$  is the adsorption energy of the TS, which can be expressed by the following formula:<sup>46,60</sup>

$$E_{TS}^{ads} = E_{TS}^{C_2H_x} + E_{TS}^H + E_{TS}^{int}. \text{ Here, } E_{TS}^{C_2H_x}, E_{TS}^H, \text{ and } E_{TS}^{int} \text{ are the adsorption energy of the gaseous } C_2H_2,$$

H and interaction between the two fragments at the TS. Analogously,  $E_{IS}^{coads}$  is the co-adsorption energy

of IS and it is shown in the following formula:  $E_{IS}^{coads} = E_{IS}^{C_2H_x} + E_{IS}^H + E_{IS}^{int}$ . Here,  $E_{IS}^{C_2H_x}$ ,  $E_{IS}^H$ , and

$E_{IS}^{int}$  are the adsorption energy of the gaseous  $C_2H_x$ , H and interaction between the two fragments at the

IS. Consequently, the variations of both the rebonding and adsorption energy summed over the fragments

$\Delta(\sum E_{frag})$  and the variations of the interaction energy ( $\Delta E_{int}$ ) make up the activation energy  $E_a$ , that is

$$E_a = \Delta(\sum E_{frag}) + \Delta E_{int}.$$

---

**Fig. S1** The relationship between the number of Pd atom and the charge transfer

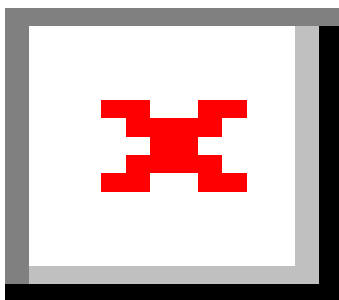

**Fig.S2** Adsorption configurations of TSSs on Pd<sub>a</sub>Ag<sub>b</sub>/TiO<sub>2</sub>-A-Ov

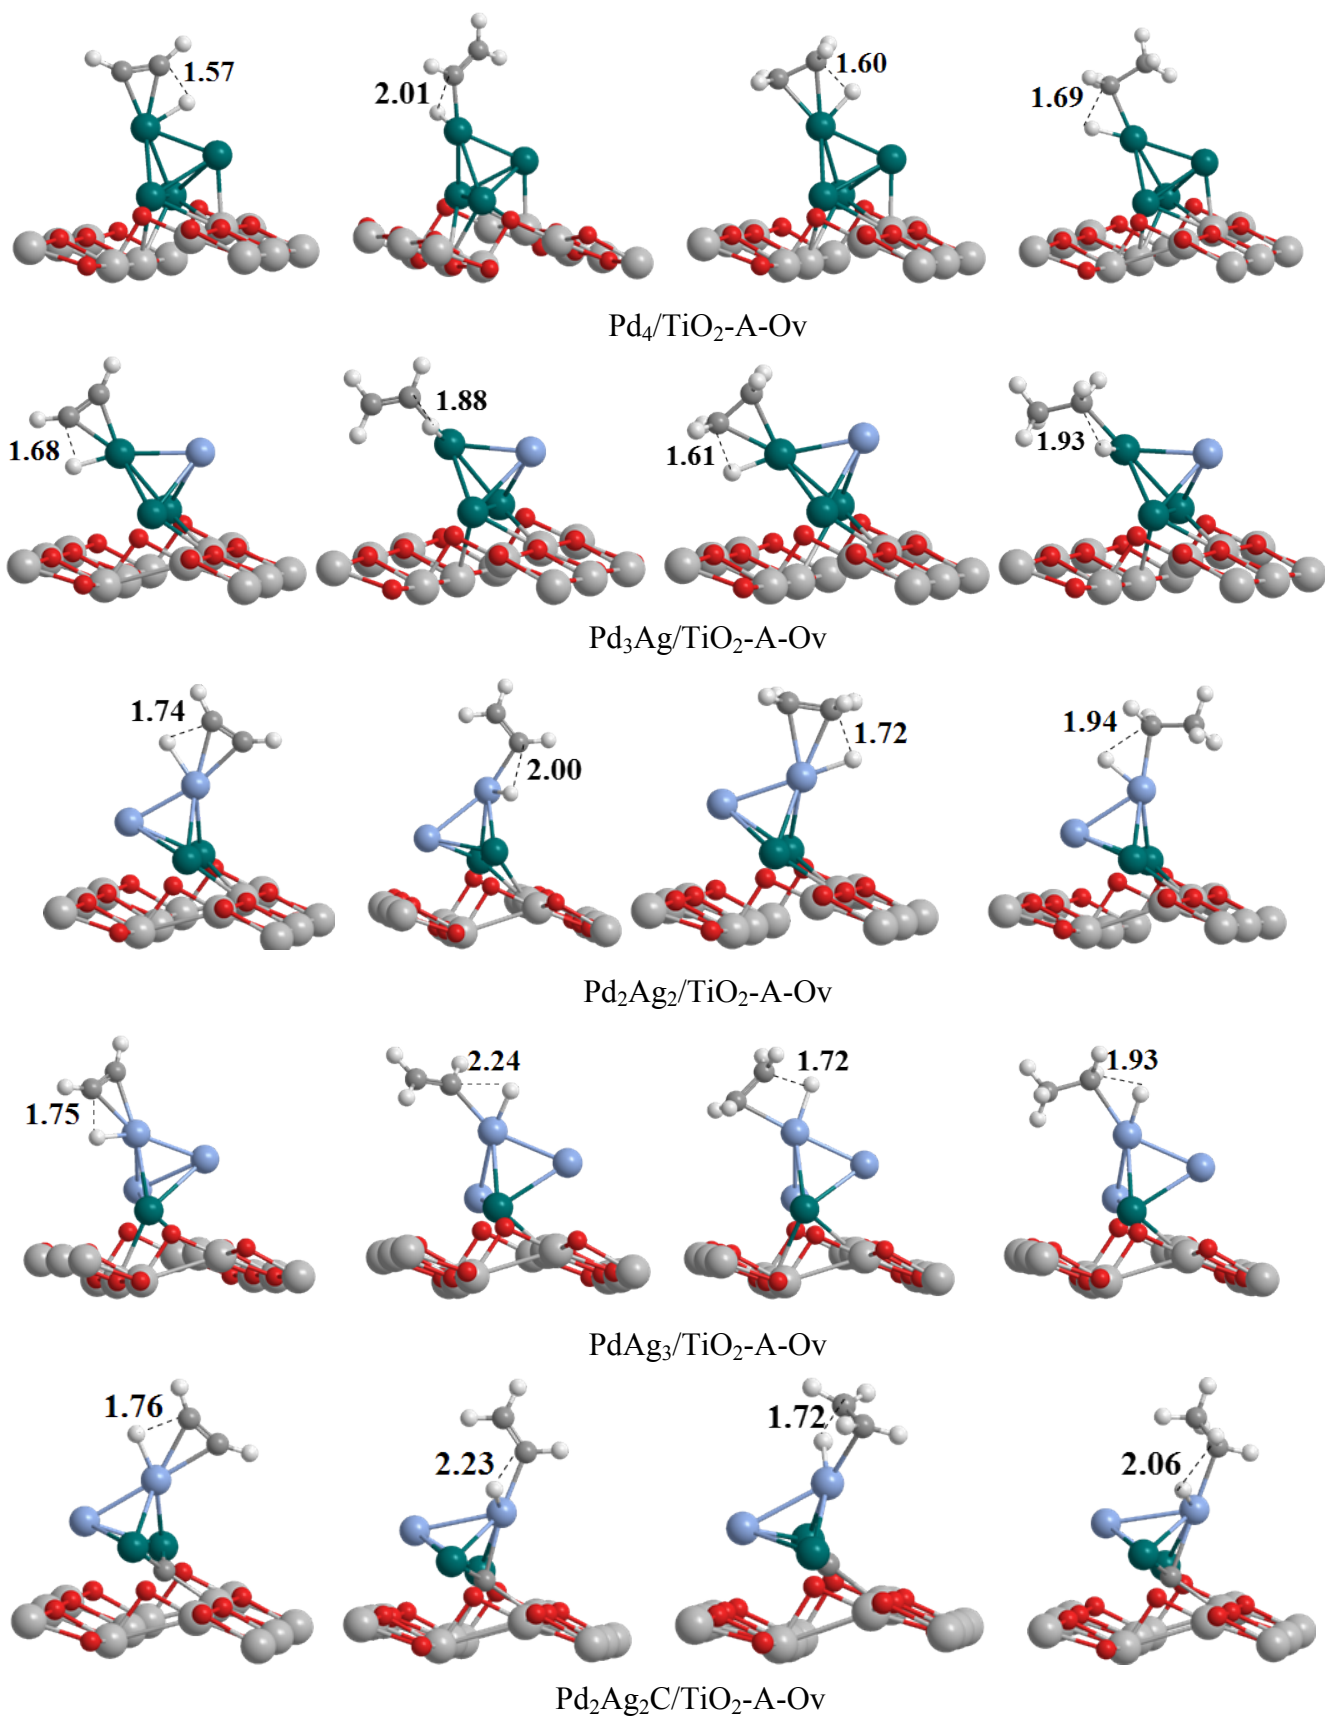

**Fig. S3** Adsorption configurations of acetylene, vinyl, ethylene and ethyl on Pd<sub>2</sub>Ag<sub>2</sub>/Pd(111) and Pd<sub>2</sub>Ag<sub>2</sub> cluster.

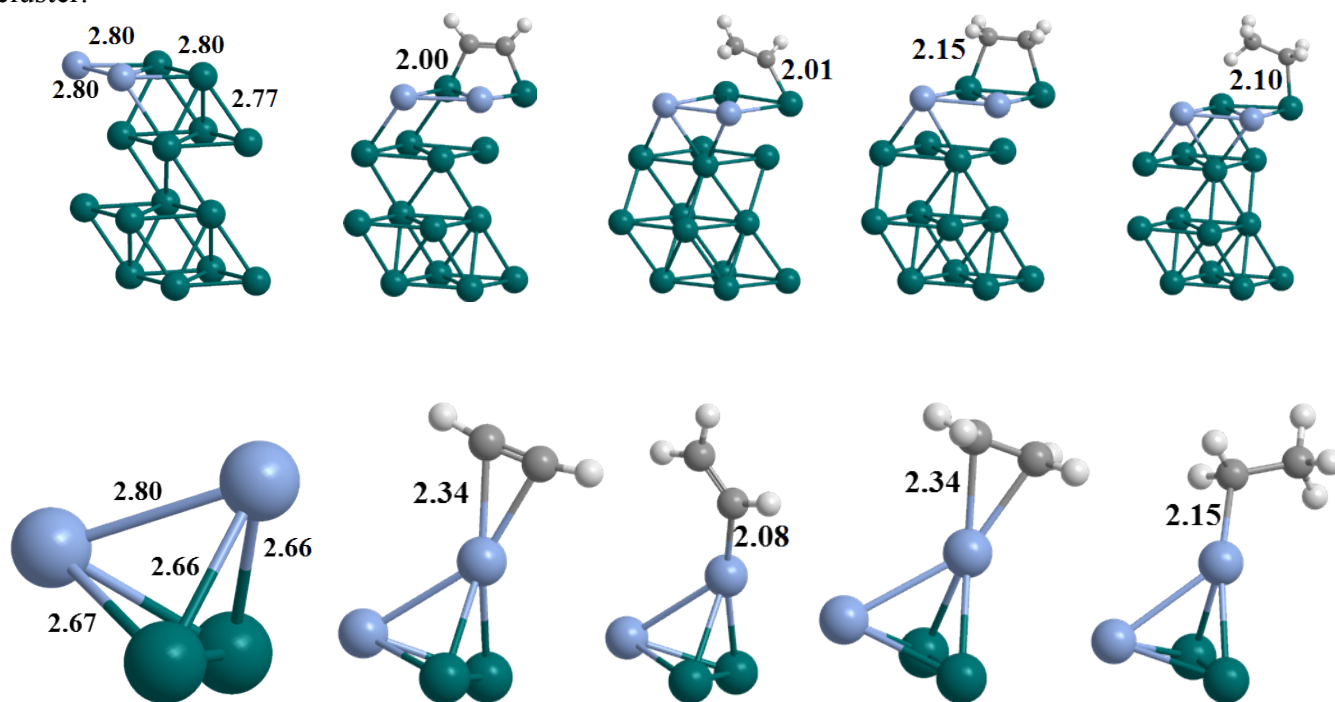

**Fig.S4** Adsorption configurations of TSSs on Pd<sub>2</sub>Ag<sub>2</sub>/Pd(111) and Pd<sub>2</sub>Ag<sub>2</sub> cluster.

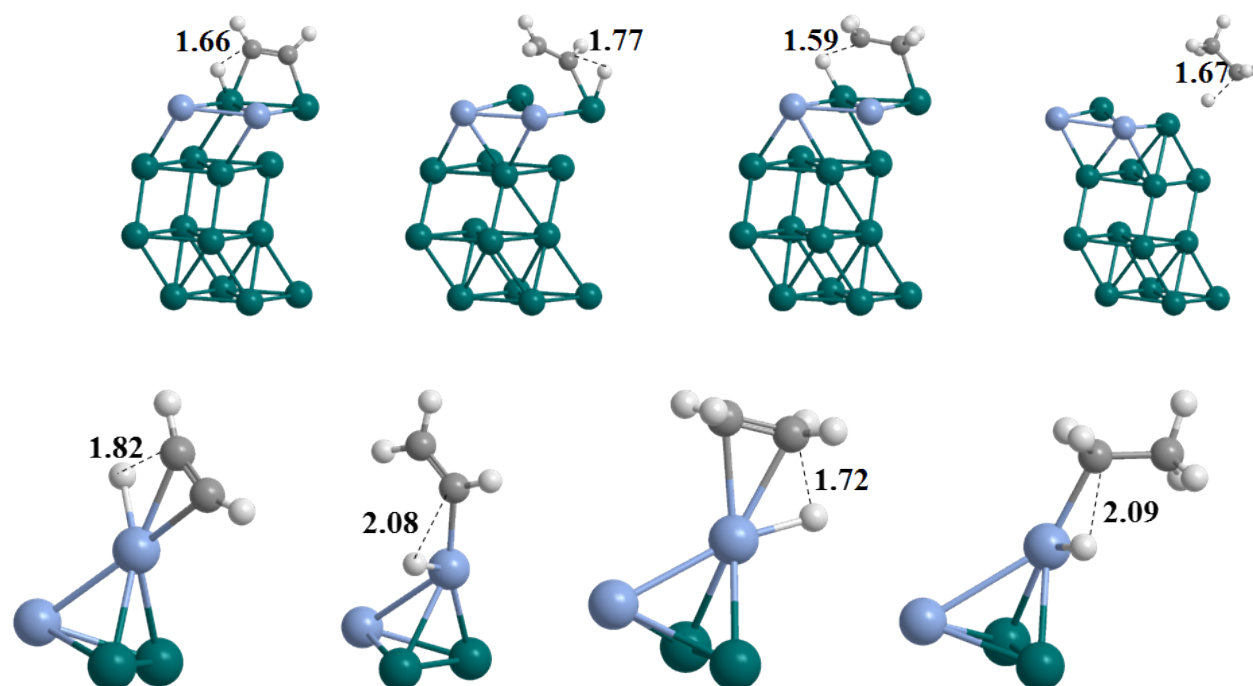

**Fig. S5** Some unselective reactions of acetylene hydrogenation on Pd<sub>2</sub>Ag<sub>2</sub>/TiO<sub>2</sub>-A-Ov surface. Activation energy, reaction heat, and corresponding geometry parameters of TS are pointed out. Bond lengths are in Å.

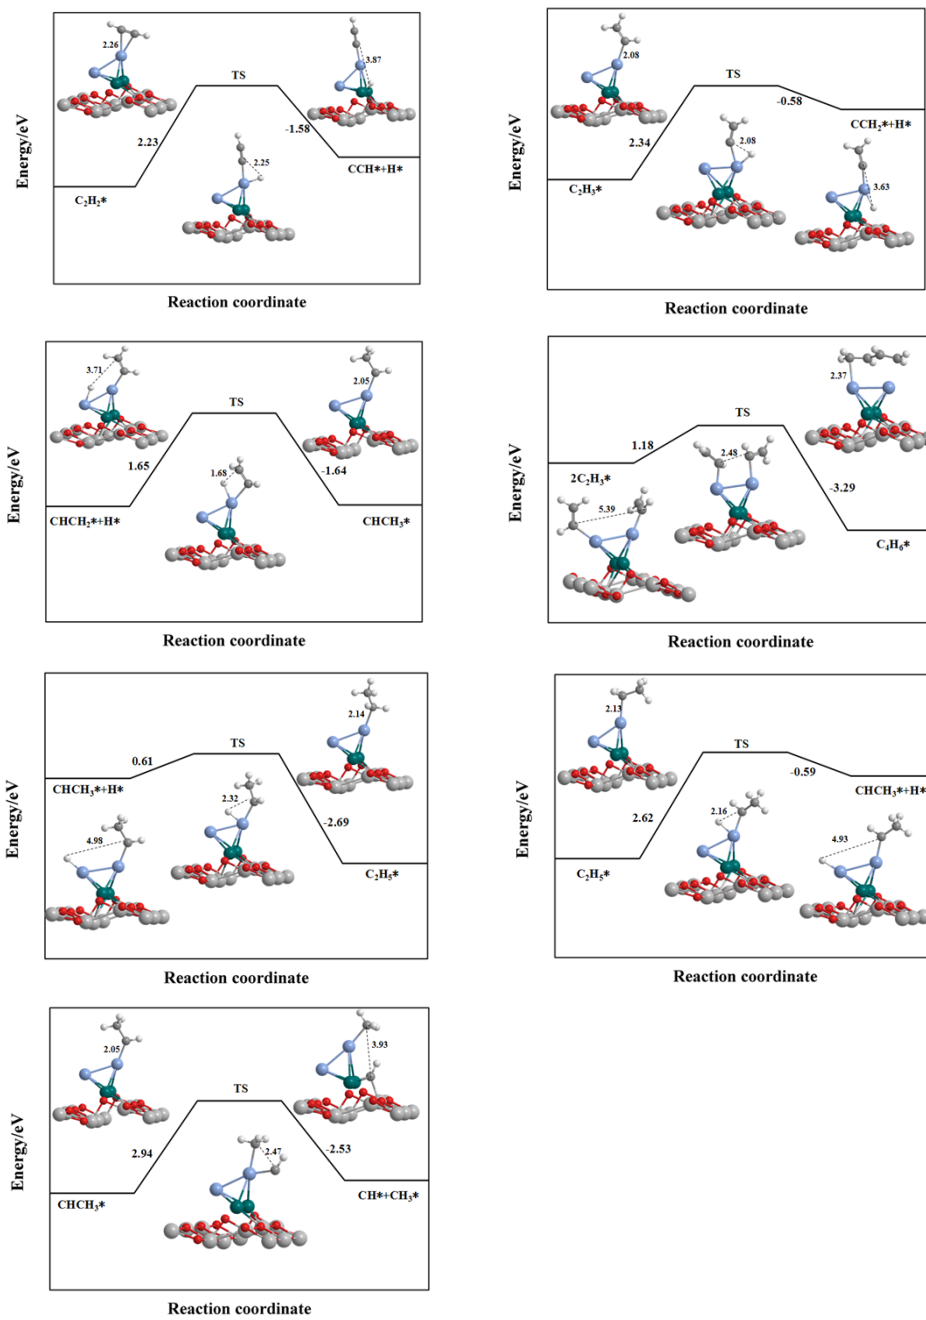

**Fig. S6** Optimized adsorption configurations (both side view and top view) of carbon atom on Pd<sub>2</sub>Ag<sub>2</sub>/TiO<sub>2</sub>-A-Ov system.

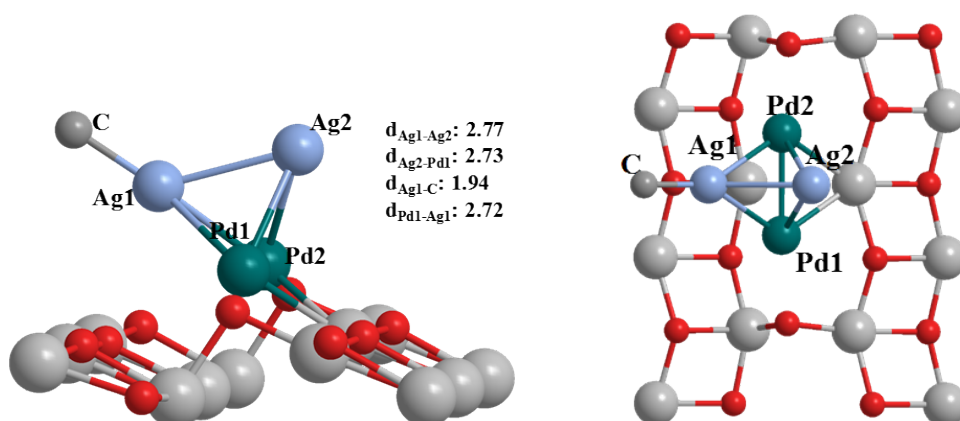

(a) top-Ag

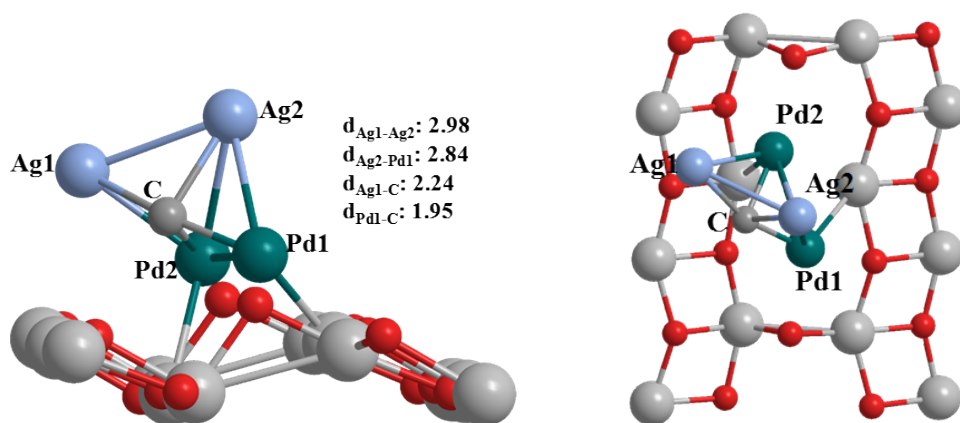

(b) bri-Pd-Ag

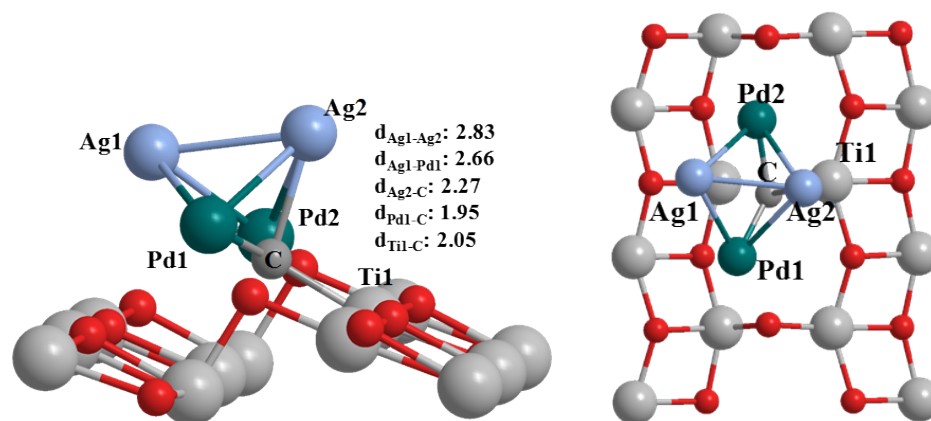

(c) bri-Ag-Ag



**Fig. S7** Adsorption configurations of acetylene, vinyl, ethylene and ethyl at Pd<sub>2</sub>Ag<sub>2</sub>-anatase interface.

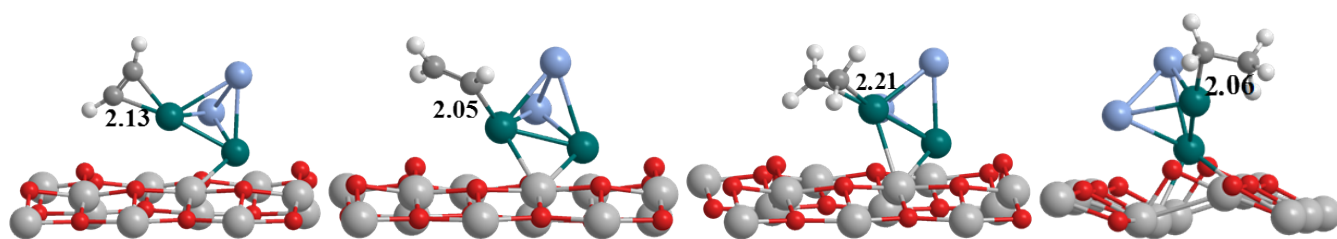

**Fig. S8** Adsorption configurations of reactants and TSs at Pd<sub>2</sub>Ag<sub>2</sub>-anatase interface.

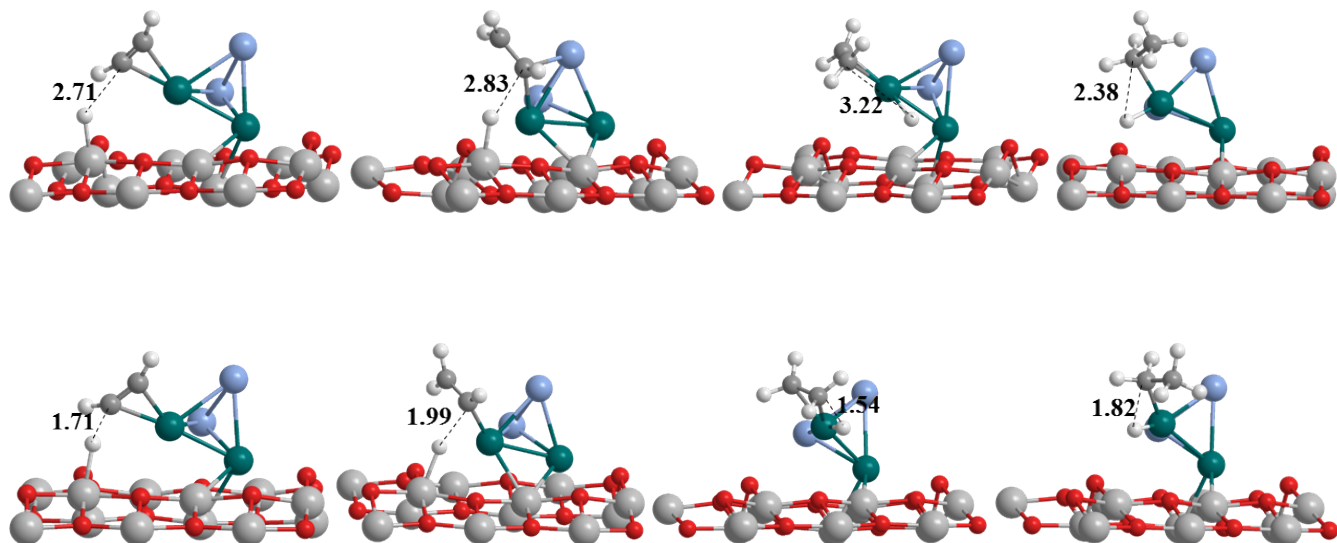

Supplement: c4cp01818d1.pdf [file c4cp01818d1.pdf]
